# Supplementary material for: Colorimetric and electrochemical dual-mode uric acid determination utilizing peroxidase-mimicking activity of CoCu bimetallic nanoclusters
Source: Royal Society of Chemistry journal article supplement (doi:10.1039/d3ay02026f), 2024-01-01
Supplement: d3ay02026f1.pdf [file d3ay02026f1.pdf]

# Colorimetric and electrochemical dual-mode uric acid determination utilizing peroxidase mimics activity of CoCu bimetallic nanoclusters

Yaopeng Liu<sup>a,b,c</sup>, Wei Zhao<sup>d,e</sup>, Yi Gao<sup>a,b,c</sup>, Qing Zhuo<sup>d,e</sup>, Tingting Chu<sup>a,b,c</sup>, Chengyu Zhou<sup>a,b,c</sup>, Wensheng Huang<sup>a,b,c</sup>, Yin Zheng<sup>\*a,b,c</sup> and Yingru Li<sup>\*d,e</sup>

\*Corresponding author

E-mail address: zhengyin0617@163.com; Liyingru@outlook.com

## 2. Experimental section

### 2.1. Materials and instruments

Uric acid (UA), 3,3',5,5'-tetramethylbenzidine (TMB), 5,5-Dimethyl-1-pyrroline N-oxide (DMPO), L-Glycine (Gly) and other amino acid were purchased from Shanghai Aladdin Bio-Chem Technology Co., LTD. (Shanghai, China). Cobalt acetate tetrahydrate ( $C_4H_6CoO_4 \cdot 4H_2O$ ), Copper acetate monohydrate ( $C_4H_6CuO_4 \cdot H_2O$ ), 1,3,5-Benzenetricarboxylic acid (BTC), terephthalic acid (TA), ethylene glycol, N, N-dimethylformamide (DMF), hydrogen peroxide (30%  $H_2O_2$ ), sodium acetate (NaAc), acetic acid (HAc), potassium phosphate monobasic ( $KH_2PO_4$ ) and sodium phosphate dibasic ( $Na_2HPO_4$ ) were obtained from Sinopharm Chemical Reagent Co., Ltd. (Shanghai, China). Ultrapure water was used as experimental water throughout the experiment.

Ultraviolet spectra were performed by a Shimadzu UV-2550 UV-Visible spectrophotometer (Shimadzu Co., Kyoto, Japan). Electrochemical experiments were performed using a CHI-660E electrochemical workstation (Chenhua Apparatus Co., Shanghai, China). Fluorescence spectra were recorded on an RP-5301PC fluorescence spectrophotometer (Shimadzu Co., Kyoto, Japan). The scanning electron microscope (SEM) and transmission electron microscopy (TEM) images were obtained using a scanning electron microscope (Quanta FEG 250 and FEI Tecnai F20, FEI, USA). The material was confirmed using AVATAR 370 Fourier Transform Infrared Spectrometer (Thermo-Nicolet, USA). The crystal structures of the samples were characterized by X-ray diffraction (XRD-7000, Shimadzu, Japan). X-ray Photoelectron Spectroscopy (XPS) was recorded by Kratos AXIS Supra spectrometer (Ultima IV, Rigaku Corporation, Japan).  $N_2$  sorption analysis was recorded on the AUTOSORB IQ porosimeter (Quantachrome, America).

### 2.2. Synthesis of Co@Cu-BNCs

Firstly,  $C_4H_6CoO_4 \cdot 4H_2O$  (1.0 g 4.0 mmol),  $C_4H_6CuO_4 \cdot H_2O$  (1.0 g 5.0 mmol), BTC (3.0 g 14.3 mmol) were dissolved into 30 mL DMF, and then the obtained solution was transferred into 30 mL ethylene glycol to form a mixed solution. After vigorously stirring the solution for 0.5 hours, it was transferred to a high-pressure reactor. The reactor was heated to 160 °C in an oven, and held at this temperature for 10 hours. After being naturally cooled to room temperature, the Co@Cu-BNC precursor was obtained. After washing with ethanol and deionized water, drying under vacuum at 70 °C, a slightly light green powders were produced. Then the precursor was heated to 700 °C at 5 °C min<sup>-1</sup> under nitrogen atmosphere in a tube furnace and maintained for 2 hours, and CoCu Bimetal Nanoclusters (Co@Cu-BNCs) was obtained.

### 2.3. Fabrication of the enzymatic-like Modified Electrode

The glassy carbon electrode (GCE) was polished on a polishing cloth containing 0.05 μm polishing powder ( $Al_2O_3$ ) and then ultrasonicated in anhydrous ethanol and ultrapure water for 3 minutes, respectively. 5 mg Co@Cu-BNCs material in 0.5 mL DMF was ultrasonicated for 2 hours to make the

dispersive solution, and then 3  $\mu\text{L}$  of the dispersion it was added to the surface of the GCE by a pipette. Finally, the decorated GCE was vacuum dried at 90  $^{\circ}\text{C}$ , named as Co@Cu-BNCs/GCE.

## 2.4. Peroxidase mimics activity of Co@Cu-BNCs

By examining the catalytic activity of the Co@Cu-BNCs at various temperatures (20 – 50  $^{\circ}\text{C}$ ) and pH (3.0 – 8.0), the optimum reaction condition for the colorimetric system was determined. The catalytic activity was calculated based on  $(A_s/A_m) \times 100$ , where  $A_s$  is the absorbance value of each reaction system after stabilization and  $A_m$  is the maximum absorbance value of all the reaction systems studied.

To study the peroxidase-like activity of Co@Cu-BNCs, TMB was chosen as the chromogenic substrate. Typically, 30  $\mu\text{L}$  of Co@Cu-BNCs solution (1.0  $\text{mg mL}^{-1}$ ) was added into 1.97 mL of NaAc-HAc buffer solutions (0.2 M, pH=4.5) containing TMB (10 mM) and  $\text{H}_2\text{O}_2$  (125 mM) in a colorimetric cylinder. The UV-Visible spectrum was obtained after reaction at 30  $^{\circ}\text{C}$  for 60 minutes.

## 2.5. Steady-state kinetic Study for peroxidase mimics

To determine the affinity between the Co@Cu-BNCs and  $\text{H}_2\text{O}_2$  (or TMB), a series of substrate concentrations of  $\text{H}_2\text{O}_2$  (or TMB) were added into NaAc-HAc buffer solutions (1.9 mL, 0.2 M, pH=4.5) containing Co@Cu-BNCs (15  $\mu\text{g mL}^{-1}$ ). In the TMB+ $\text{H}_2\text{O}_2$ +Co@Cu-BNCs system, steady-state kinetic experiments were implemented under the optimum reaction conditions by altering the TMB or  $\text{H}_2\text{O}_2$  concentrations. On a UV-Visible spectrophotometer, kinetic tests were conducted in time course mode to record the change in absorbance at 652 nm. According to the Michaelis-Menten equation<sup>1</sup>,  $v = V_{\max}[S]/(K_m + [S])$ , the kinetic constants were calculated, where  $v$  is the initial rate,  $[S]$  is the substrate concentration,  $V_{\max}$  is the maximum velocity, and  $K_m$  is the Michaelis constant.

## 2.6. Catalytic mechanism for peroxidase mimics activity.

In order to explore the reactive oxygen species (ROS) in this system, some radical scavengers were used. For example, thiourea ( $\cdot\text{OH}$  scavenger),  $\text{NaN}_3$  ( $^1\text{O}_2$  scavenger) and p-benzoquinone ( $\text{O}_2^{\cdot-}$  scavenger) were added respectively to the TMB+ $\text{H}_2\text{O}_2$ +Co@Cu-BNCs system. The concentrations of thiourea,  $\text{NaN}_3$  and p-benzoquinone were 0.25 mM or 0.5 mM. In addition, the determination of  $\cdot\text{OH}$  was based on the reaction of TA and OH. TA is capable of capturing  $\cdot\text{OH}$  and generating 2-hydroxy terephthalic acid with unique fluorescence around 435 nm. The concentrations of TA,  $\text{H}_2\text{O}_2$  and nanozymes were 0.6 mM, 2.5 mM and 15  $\mu\text{g mL}^{-1}$ , respectively. Then, the fluorescence spectra of the different system were evaluated ( $\lambda_{\text{ex}}$ =315 nm,  $\lambda_{\text{em}}$ =435 nm). By using the DMPO (80 mM) as spin trapping agent, the generation of the  $\cdot\text{OH}$  radical was further confirmed by the electron spin resonance (ESR) experiment.

## 2.7. Dual-mode sensing platform for UA detection

For UA detection, 100  $\mu\text{L}$  of UA with different concentration, 40  $\mu\text{L}$  of  $\text{H}_2\text{O}_2$  (125 mM) with various concentration, 30  $\mu\text{L}$  of TMB (10 mM) and 30  $\mu\text{L}$  of Co@Cu-BNCs (1.0  $\text{mg mL}^{-1}$ ) were added to NaAc-HAc buffer solutions (1.8 mL, 0.2 M, pH=4.5) in sequence. Then, the mixed solution was kept at 30  $^{\circ}\text{C}$  for 15 minutes and successively the UV-Visible spectrum of the mixture was recorded.

All electrochemical detections were performed in a typical three-electrode system at room temperature, using a bare GCE or Co@Cu-BNCs/GCE as working electrodes, a platinum electrode as the auxiliary electrode, and a saturated calomel electrode ( $\text{Hg/KCl/Hg}_2\text{Cl}_2$ ) as the reference electrode. The concentration of UA in a phosphate-buffered solution (PBS, 0.1 M, pH=6.0) was determined by differential pulse voltammetry (DPV).

## 2.8. UA assay in human serum samples

The serum was collected from a group of volunteers from the Affiliated Hospital of Hubei Minzu University. The standard additive method was employed to show the practical applicability<sup>2</sup>. After diluting the serum with ultra-pure water to a final dilution of 200 times, the serum sample was added with UA standard solution at varying concentrations. Then, UA was detected with the same procedures described above.

## References

1. J. Chen, F. Xu, Q. Zhang and S. Li, *Anal Chim Acta*, 2021, **1180**, 338740.
2. Z. Ma, L. Yang, Y. Wang, M. Wang, W. Qi and Z. He, *Chemical Engineering Journal*, 2021, **416**.
